# Supplementary material
Source: PubMed Central journal article supplement (PMC2943007)

A

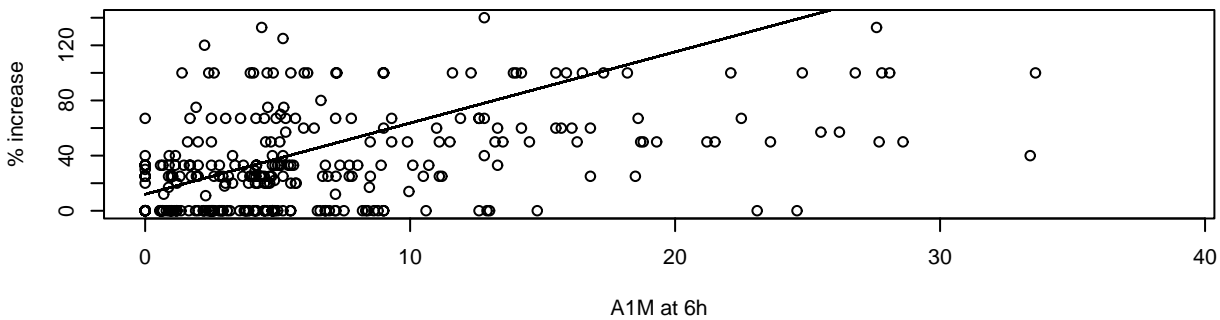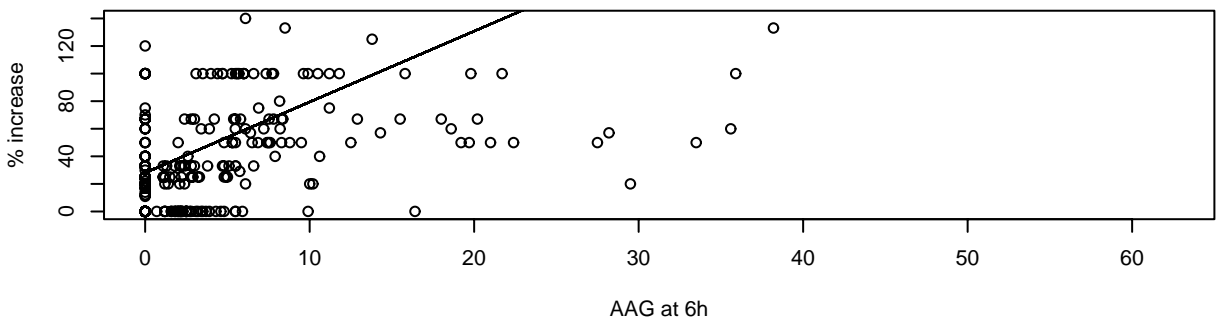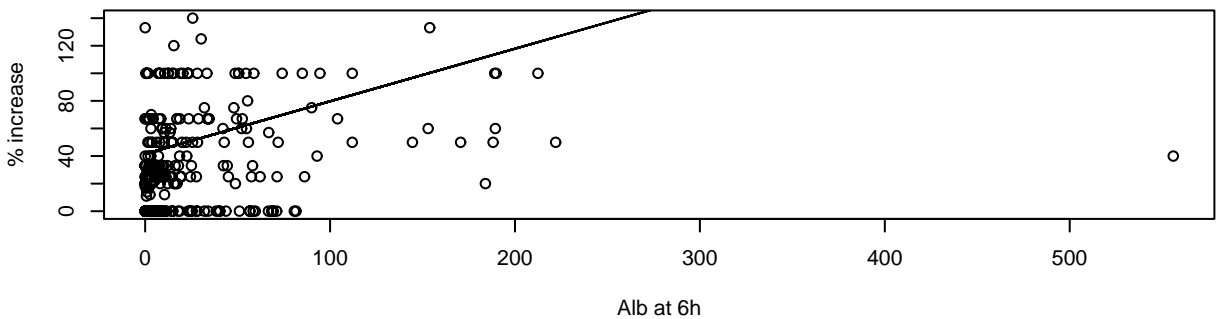

**B**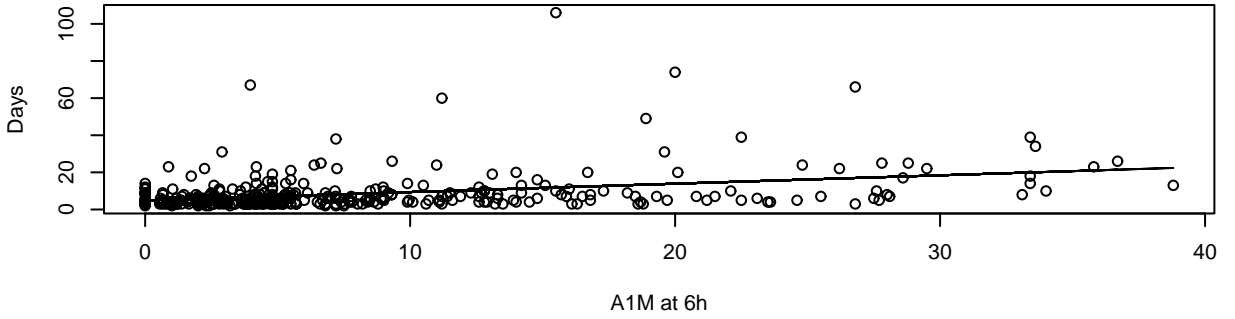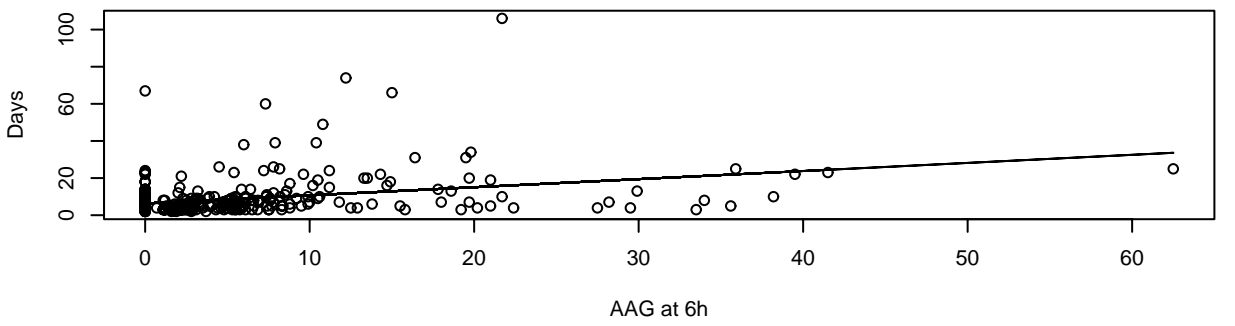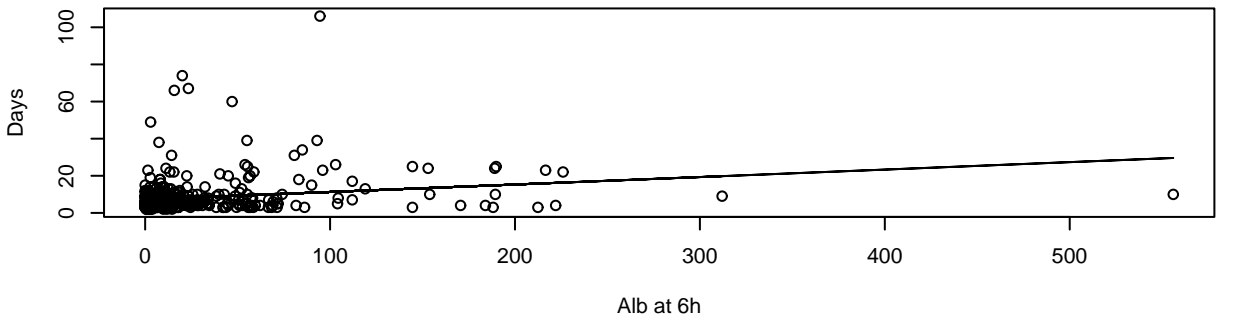

Supplement: NIHMS215354-supplement-01.pdf [file NIHMS215354-supplement-01.pdf]
